# Supplementary material for: Niche Selection by Soil Bacterial Community of Disturbed Subalpine Forests in Western Sichuan
Source: MDPI journal article supplement (doi:10.3390/f12040505), 2021-04-17
Supplement: s1 [file s1]

**Table S1.** The plot characteristics of the four successional stages in a Miyaluo region of Sichuan.

| Forest Type                   | Community Height(m) | Slope | Average Elevation | Dominant Species                             |
|-------------------------------|---------------------|-------|-------------------|----------------------------------------------|
| Shrub grassland               | 2.2±1.1             | 10-18 | 3582-3643-        | <i>Salix cupularis</i> , <i>Koehneana</i>    |
| Broad leaved forest           | 11±4.3              | 18-20 | 3435-3572.9       | <i>Betula</i> , <i>Acer</i> , <i>Populus</i> |
| Coniferous broadleaved forest | 13±5.2              | 17    | 3551.8-3579       | <i>Betula</i> , <i>Abies</i> , <i>Acer</i>   |
| Primary forest                | 17±3.1              | 18-25 | 3579.4-3716.7     | <i>Picea</i> , <i>Abies</i>                  |

**Table S2.** The bacterial communities in the different rehabilitation stages at different Phylum levels.

|                          | SG          | BF          | MF          | PF          |
|--------------------------|-------------|-------------|-------------|-------------|
| Proteobacteria           | 42.06±4.23a | 39.34±4.81a | 38.00±3.92a | 39.32±4.24a |
| Acidobacteria            | 26.39±4.61b | 35.03±4.48a | 35.82±4.90a | 36.74±4.07a |
| Bacteroidetes            | 10.29±2.38a | 8.83±1.42ab | 7.7±0.57b   | 9.47±1.28a  |
| Actinobacteria           | 8.22±2.28a  | 5.66±0.89b  | 5.3±1.31b   | 5.78±0.77b  |
| Verrucomicrobia          | 5.68±2.14ab | 5.78±0.99ab | 7.12±1.29a  | 4.85±0.73b  |
| Nitrospirae              | 2.40±0.77a  | 1.10±0.72b  | 1.20±0.46b  | 0.20±0.14c  |
| Gemmatimonadetes         | 1.33±0.58a  | 1.44±0.26a  | 1.36±0.19a  | 1.31±0.38a  |
| Candidate_division_WPS-1 | 1.01±0.43a  | 1.27±0.67a  | 1.00±0.15a  | 1.37±0.14a  |
| Chloroflexi              | 0.60±0.38b  | 0.49±0.22b  | 1.30±0.68a  | 0.35±0.20b  |
| others                   | 2.02±0.73a  | 1.05±0.14b  | 1.19±0.14b  | 0.60±0.63c  |

**Table S3.** The bacterial communities in the different rehabilitation stages at different Class levels.

|                     | SG          | BF          | MF          | PF          |
|---------------------|-------------|-------------|-------------|-------------|
| Alphaproteobacteria | 17.59±2.13a | 21.50±3.94a | 17.95±7.55a | 21.82±2.82a |
| Betaproteobacteria  | 13.72±3.38a | 8.04±1.40b  | 7.53±3.57bc | 5.27±1.98c  |
| Acidobacteria_Gp3   | 6.03±2.53b  | 11.15±1.97a | 8.42±3.55b  | 11.40±1.11a |
| Acidobacteria_Gp1   | 3.44±2.72c  | 8.65±2.17b  | 7.43±3.26b  | 13.39±3.41a |
| Actinobacteria      | 8.62±2.38a  | 5.93±0.89b  | 4.99±2.39b  | 6.20±0.90b  |
| Gammaproteobacteria | 5.71±1.23b  | 6.73±0.93b  | 5.46±2.34b  | 8.52±0.53a  |
| Sphingobacteriia    | 5.58±1.74bc | 6.86±1.33ac | 4.83±2.07b  | 8.27±1.36a  |
| Deltaproteobacteria | 6.37±2.16a  | 3.20±0.78b  | 2.70±1.14b  | 2.77±0.98b  |
| Spartobacteria      | 2.73±1.41a  | 3.16±0.79a  | 3.34±1.56a  | 1.48±0.24b  |
| Subdivision3        | 2.78±1.00a  | 2.50±0.57a  | 2.59±1.09a  | 3.05±0.59   |

**Table S4.** The bacterial communities in the different rehabilitation stages at different Order levels.

|                    | SG         | BF          | MF          | PF          |
|--------------------|------------|-------------|-------------|-------------|
| Rhizobiales        | 8.79±0.77a | 9.52±2.31a  | 9.42±1.74a  | 7.97±1.35a  |
| Sphingobacteriales | 5.44±1.73b | 6.74±1.31b  | 5.36±0.80b  | 8.13±1.35a  |
| Rhodobacterales    | 3.09±0.64c | 4.78±0.73b  | 4.40±0.53b  | 5.58±0.71a  |
| Myxococcales       | 4.33±1.13a | 2.60±0.72b  | 2.43±0.36b  | 2.13±0.88b  |
| Actinomycetales    | 3.15±1.00a | 2.23±0.36bc | 2.12±0.53c  | 2.83±0.37ab |
| Nitrospirales      | 2.63±0.85a | 1.20±0.79b  | 1.30±0.49b  | 0.22±0.16c  |
| Xanthomonadales    | 1.34±0.52b | 1.94±0.48a  | 1.60±0.39ab | 1.99±0.19a  |
| Burkholderiales    | 1.53±0.35a | 1.09±0.25b  | 1.00±0.18b  | 1.12±0.19b  |
| Cytophagales       | 1.97±0.78a | 0.69±0.41b  | 0.89±0.25b  | 0.53±0.34b  |
| Gaiellales         | 1.37±0.60a | 0.87±0.25b  | 1.01±0.34ab | 0.43±0.11c  |

**Table S5.** Mantel test showing the effects of rehabilitation stage and soil factors on bacteria community structure.

|                      | Bacteria       |          |
|----------------------|----------------|----------|
|                      | R <sup>2</sup> | <i>p</i> |
| Rehabilitation stage | <b>0.544</b>   | 0.001    |
| pH                   | <b>0.608</b>   | 0.001    |
| EC                   | -0.071         | 0.726    |
| AK                   | 0.175          | 0.05     |
| AP                   | <b>0.292</b>   | 0.002    |
| N                    | -0.073         | 0.716    |
| C                    | 0.015          | 0.384    |
| TP                   | -0.021         | 0.49     |
| TK                   | 0.156          | 0.108    |
| NH4                  | 0.114          | 0.129    |
| NO3                  | -0.028         | 0.578    |
| WCS                  | <b>0.209</b>   | 0.023    |
| CN                   | <b>0.37</b>    | 0.002    |

**Table S6.** Relative importance of the significant independent variables explaining the variance in abundance of the different taxonomic groups.

|     | Acidobacteria       | Actinobacteria     | Proteobacteria      | Bacteroidetes       | Nitrospirae        | Verrucomicrobia     | Gemmatimonadetes    | Chloroflexi        | candida_division_WPS-1 |
|-----|---------------------|--------------------|---------------------|---------------------|--------------------|---------------------|---------------------|--------------------|------------------------|
| pH  | 0.2774<br>(-1.918)* | 0.1493<br>(0.978)  | 0.077<br>(1.696)    | 0.1705<br>(1.472)   | 0.2651<br>(1.383)  | 0.0183<br>(-1.402)  | 0.0104<br>(0.103)   | 0.0152<br>(-0.781) | 0.1017<br>(-1.288)     |
| EC  | 0.0164<br>(0.843)   | 0.046<br>(-1.204)  | 0.0245<br>(-0.302)  | 0.1819<br>(-2.532)* | 0.0503<br>(0.594)  | 0.0309<br>(1.432)   | 0.0122<br>(0.462)   | 0.0191 (0.528)     | 0.017<br>(0.665)       |
| AK  | 0.1049<br>(0.043)   | 0.0951<br>(-0.044) | 0.0968<br>(0.339)   | 0.0485<br>(-0.604)  | 0.0828<br>(-0.547) | 0.0675<br>(-0.101)  | 0.0186<br>(0.524)   | 0.0336<br>(-0.176) | 0.1126<br>(0.172)      |
| AP  | 0.0424<br>(0.199)   | 0.0396<br>(-0.434) | 0.0393<br>(-1.057)  | 0.1409<br>(1.938)   | 0.1874<br>(-1.4)   | 0.0359<br>(1.739)   | 0.1199<br>(1.89)    | 0.2203<br>(-1.371) | 0.4316<br>(2.4)*       |
| TN  | 0.0223<br>(0.559)   | 0.0265<br>(0.569)  | 0.0737<br>(-0.126)  | 0.0235<br>(0.529)   | 0.0097<br>(-0.005) | 0.0873<br>(-1.344)  | 0.0844<br>(-1.862)  | 0.1864<br>(-1.8)   | 0.0476<br>(-1.07)      |
| SOC | 0.0265<br>(-0.488)  | 0.0304<br>(-0.553) | 0.0741<br>(0.21)    | 0.027<br>(-0.681)   | 0.0128 (0.053)     | 0.0877<br>(1.052)   | 0.0862<br>(1.827)   | 0.141<br>(1.6)     | 0.0566<br>(1.063)      |
| TP  | 0.0071<br>(-0.396)  | 0.0107<br>(-0.587) | 0.0283<br>(-0.999)  | 0.0321<br>(1.234)   | 0.0041 (0.157)     | 0.1779<br>(3.024)** | 0.0712<br>(-0.303)  | 0.1408<br>(2.359)* | 0.0227<br>(0.038)      |
| TK  | 0.1783<br>(2.204)*  | 0.117<br>(-1.019)  | 0.2957<br>(-2.481)* | 0.0209<br>(-0.193)  | 0.0133<br>(-0.284) | 0.1518<br>(1.195)   | 0.05<br>(-1.26)     | 0.0923<br>(0.707)  | 0.0227<br>(0.319)      |
| NH4 | 0.0039<br>(0.218)   | 0.0611<br>(0.938)  | 0.008<br>(0.414)    | 0.1186<br>(-2.421)* | 0.0064<br>(-0.022) | 0.0109<br>(-0.694)  | 0.0478<br>(-0.63)   | 0.0313<br>(-0.889) | 0.019<br>(0.017)       |
| NO3 | 0.0167<br>(0.162)   | 0.0813<br>(-0.743) | 0.0264<br>(0.921)   | 0.1281<br>(-1.723)  | 0.053<br>(-1.057)  | 0.0053<br>(0.004)   | 0.0983<br>(1.202)   | 0.0061<br>(-0.324) | 0.0075<br>(-0.025)     |
| WCS | 0.0859<br>(-1.489)  | 0.1744<br>(1.653)  | 0.1215<br>(1.561)   | 0.0124<br>(0.794)   | 0.0035<br>(0.409)  | 0.2008<br>(-2.897)* | 0.1653<br>(-1.658)  | 0.0188<br>(0.225)  | 0.0063<br>(0.123)      |
| CN  | 0.0482<br>(1.36)    | 0.0346<br>(-0.212) | 0.1013<br>(-1.585)  | 0.0514<br>(1.06)    | 0.0299<br>(-0.307) | 0.057<br>(0.93335)  | 0.2144<br>(-2.604)* | 0.0691<br>(-0.299) | 0.0587<br>(-0.693)     |
| AGE | 0.1701<br>(0.209)   | 0.1339<br>(-0.132) | 0.0332<br>(1.189)   | 0.0443<br>(-0.404)  | 0.2817<br>(-1.016) | 0.0686<br>(-2.265)* | 0.0215<br>(-0.644)  | 0.0261<br>(-0.287) | 0.0958<br>(-1.475)     |

NOTE:., P<0.01; \*, P<0.01; \* \*, P<0.001.

**Table S7.** ANOVA analysis (Simple effect) explaining the explanatory value of single factors on the change of soil bacterial community.

|                   | Simple effect |
|-------------------|---------------|
| pH                | 14.31%        |
| Restoration stage | 17.88%        |
| AP                | 9.83%         |
| WCS               | 0.40%         |

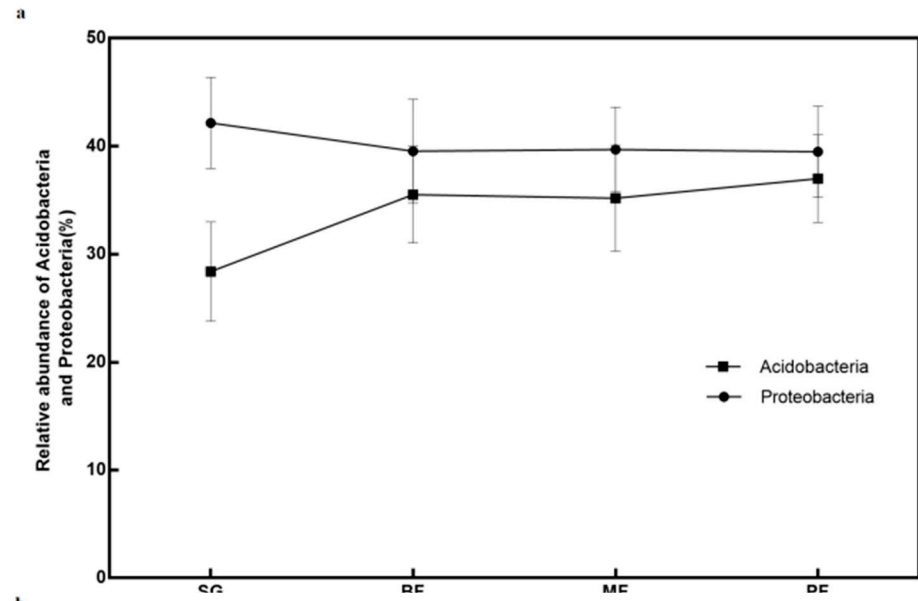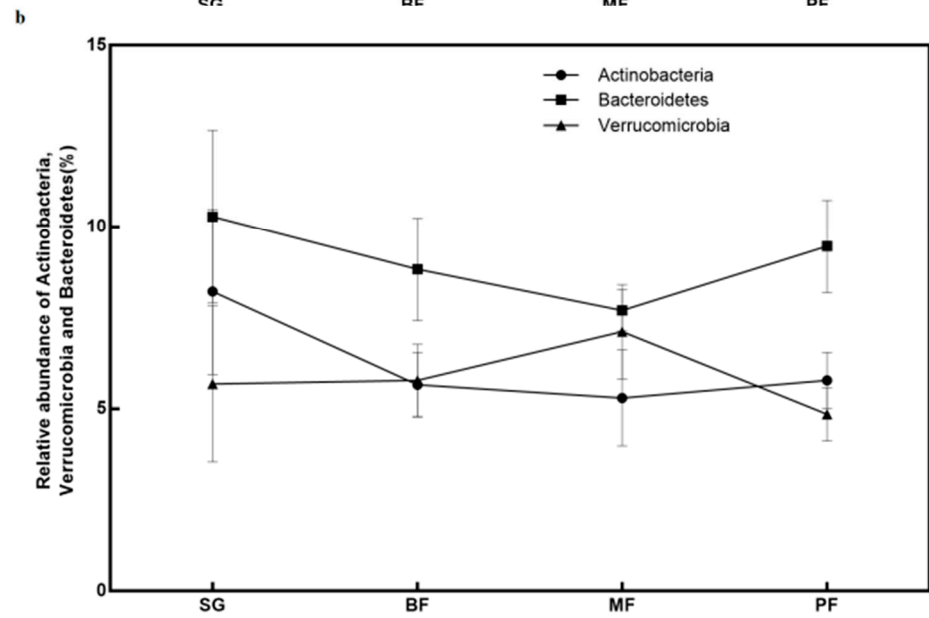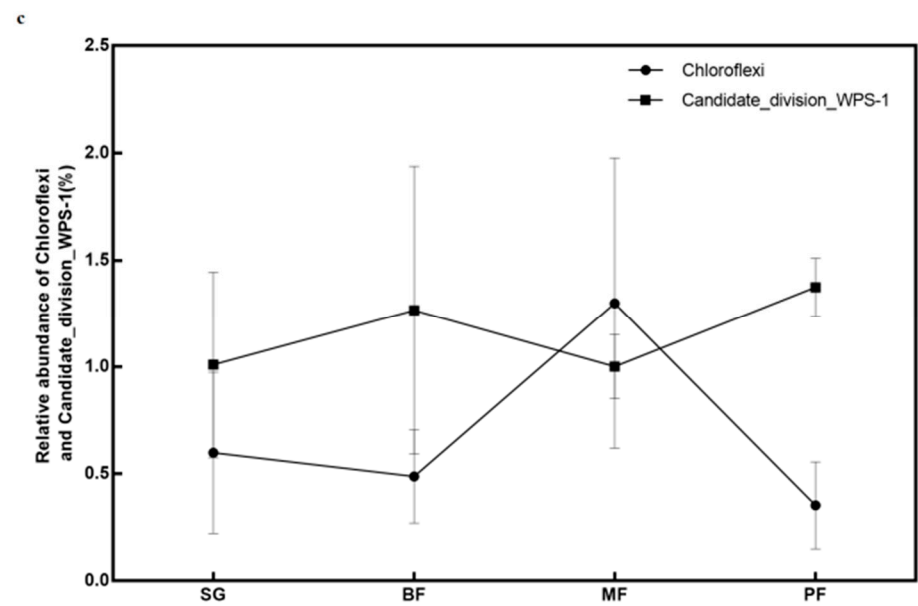

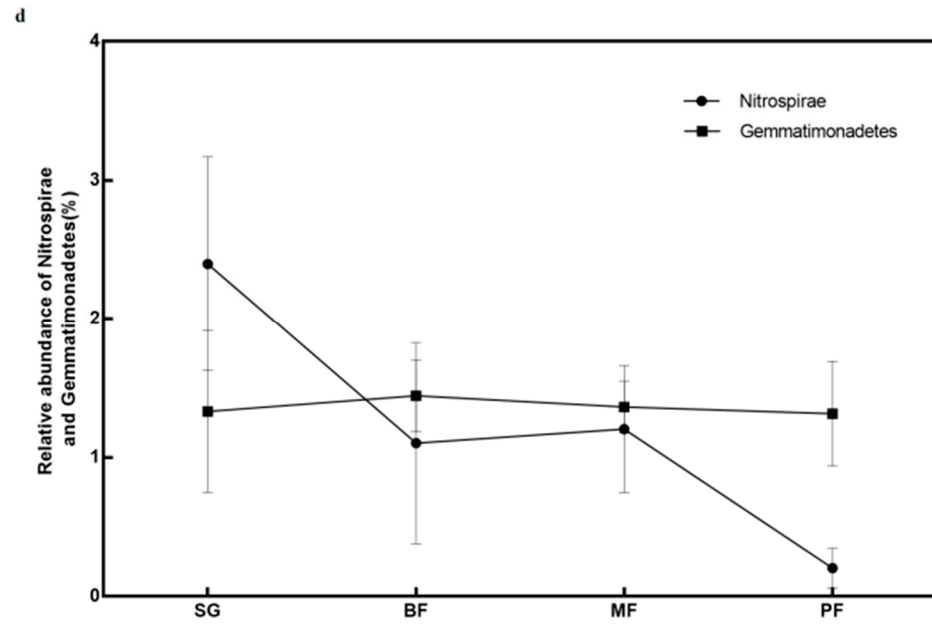

**Figure S1.** The relative abundance of dominant bacterial (a, b, c and d) at different rehabilitation stages. Error bars denote standard deviation. SG: Shrub-grassland; BF: Broad leaved; MF: Coniferous broadleaved; PF: Primary forest.
